# Supplementary material for: Fabrication of REVO4 films via sacrificial conversion from layered rare-earth hydroxide (LRH) films: the investigation of the transition mechanism and their photoluminescence
Source: Royal Society of Chemistry journal article supplement (doi:10.1039/d1dt03724b), 2022-01-01
Supplement: d1dt03724b1.pdf [file d1dt03724b1.pdf]

## Supporting Information

Fabrication of REVO<sub>4</sub> films via sacrificial conversion from Layered rare-earth hydroxides (LRHs) films: the investigation of the transition mechanism and their photoluminescence

He Zhang<sup>a</sup>, Taihui Chen<sup>a</sup>, Sen Qin<sup>a</sup>, Junjie Huang<sup>c</sup>, and Xiaoli Wu<sup>a,b,c\*</sup>

<sup>a</sup> College of Materials Science and Engineering, Guilin University of Technology, Guilin 541004, P. R. China

<sup>b</sup> Guangxi Key Laboratory of Optical and Electronic Materials and Devices, Guilin University of Technology, Guilin 541004, China

<sup>c</sup> Collaborative Innovation Center for Exploration of Hidden Nonferrous Metal Deposits and Development of New Materials in Guangxi; Guilin University of Technology, Guilin 541004, China

\*Corresponding author

Xiaoli Wu

College of Materials Science and Engineering, Guilin University of Technology, Guilin 541004, China

E-mail address: wuxiaoli@glut.edu.cn

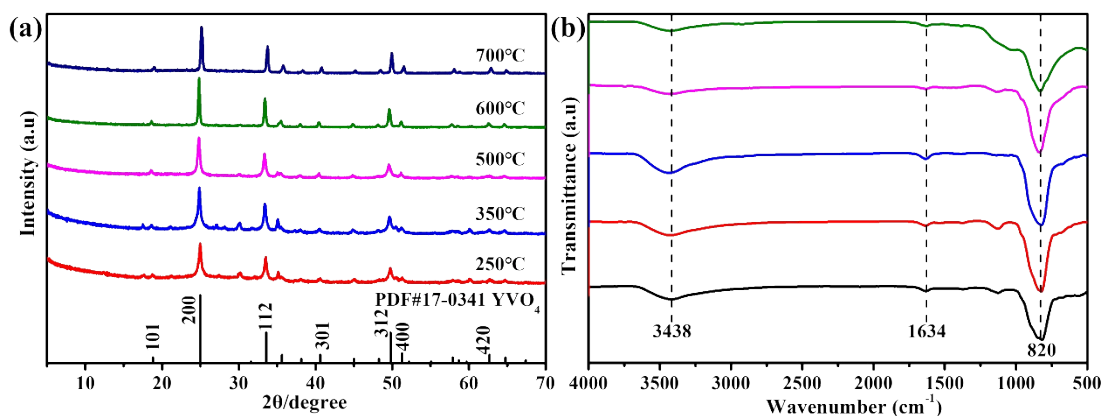

**Fig. S1.** XRD patterns (a) and FT-IR spectra (b) of  $\text{YVO}_4$  films obtained via further heat treatment at different temperatures for 2h, and the corresponding temperatures are marked in the figures.

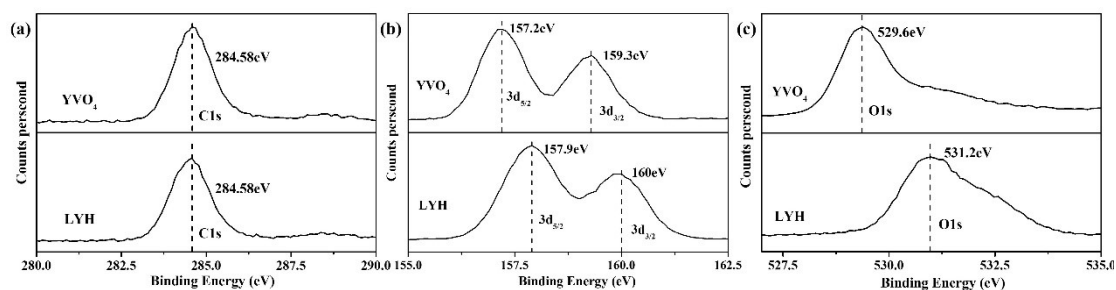

**Fig. S2.** XPS spectra of Yttrium (a), Carbon(b) and Oxygen(c) elements for  $\text{Y}_2(\text{OH})_5\text{NO}_3 \cdot n\text{H}_2\text{O}$  (LYH) film and  $\text{YVO}_4$  film, respectively.

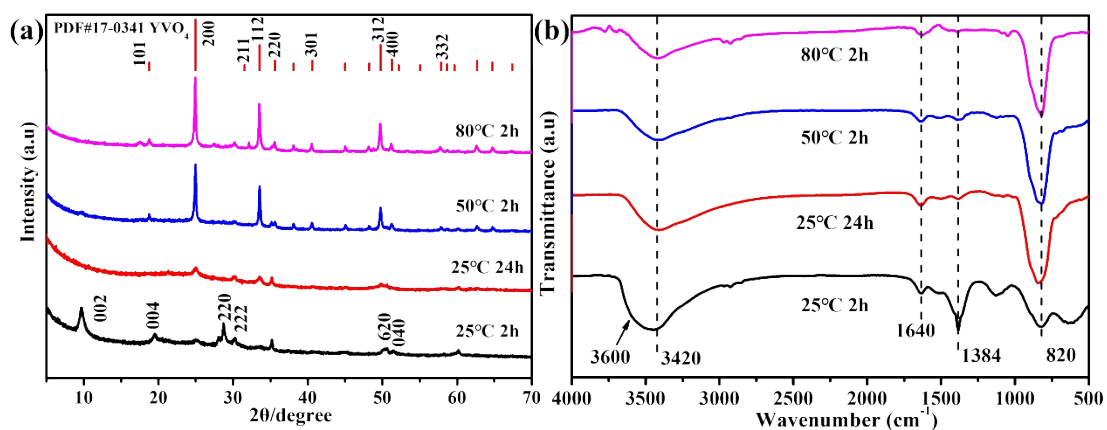

**Fig. S3.** XRD patterns (a) and FT-IR spectra (b) of  $\text{YVO}_4$  films prepared at lower temperatures, and the corresponding reaction conditions are marked in the figures.

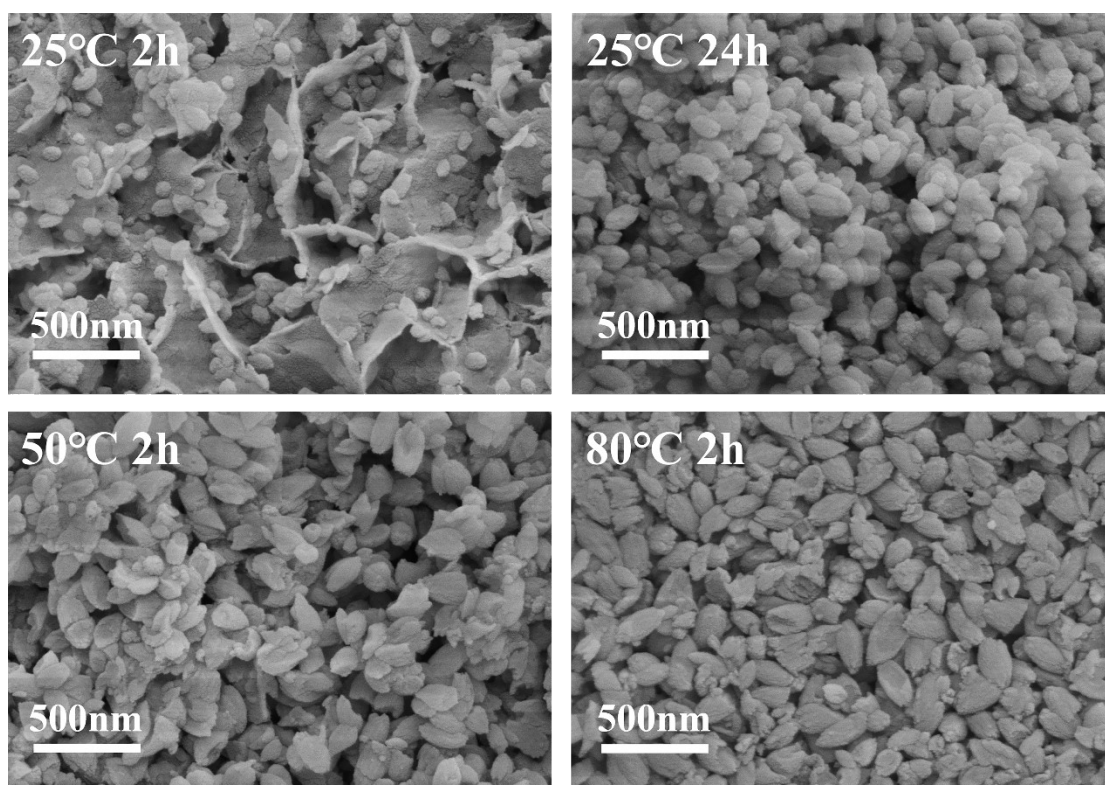

**Fig. S4.** FE-SEM images of  $\text{YVO}_4$  films prepared at lower temperatures, and the corresponding reaction conditions were marked in the figures.

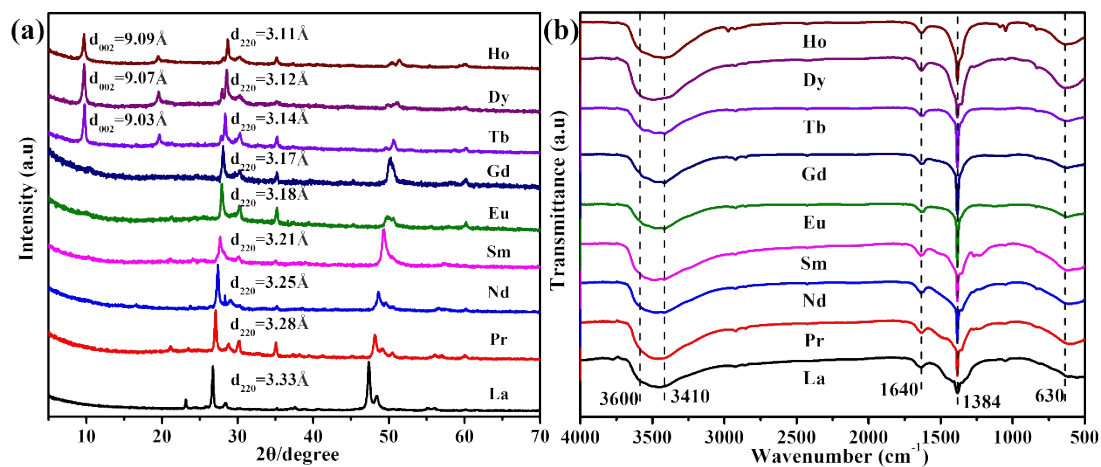

**Fig. S5.** XRD patterns (a) and FT-IR spectra (b) of the  $\text{RE}_2(\text{OH})_5\text{NO}_3 \cdot n\text{H}_2\text{O}$  (RE = La–Ho) films.

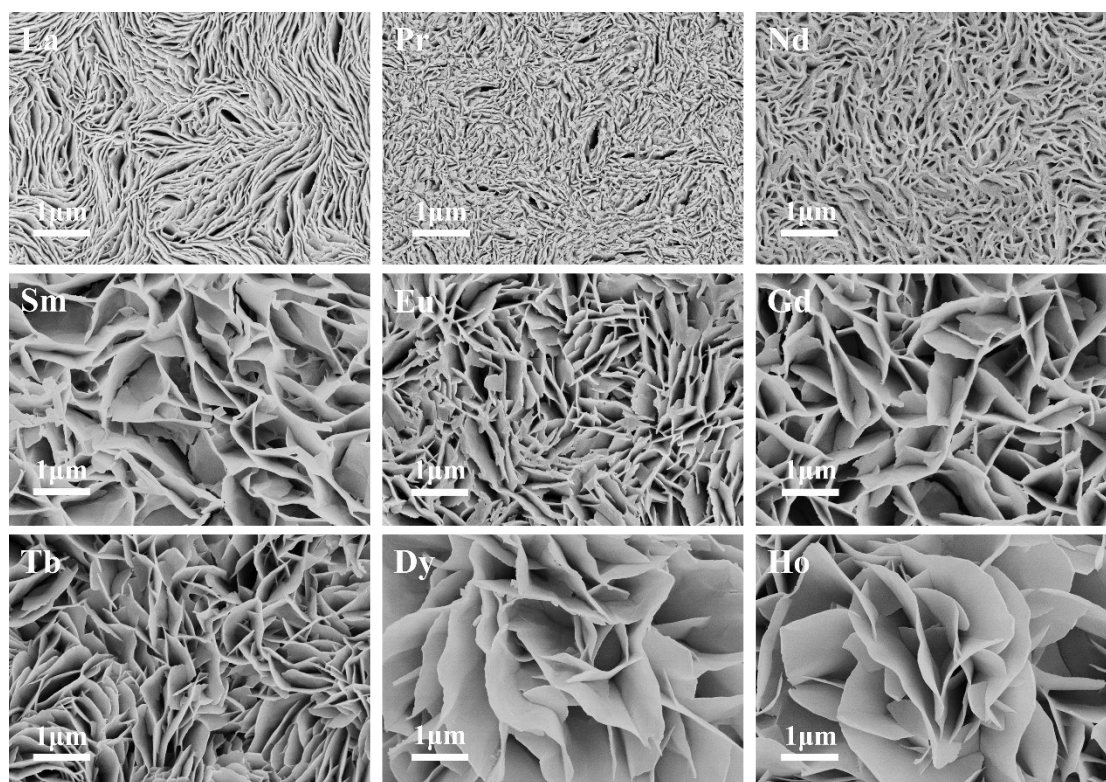

**Fig. S6.** FE-SEM images of the  $\text{RE}_2(\text{OH})_5\text{NO}_3 \cdot n\text{H}_2\text{O}$  (RE = La–Ho) films.

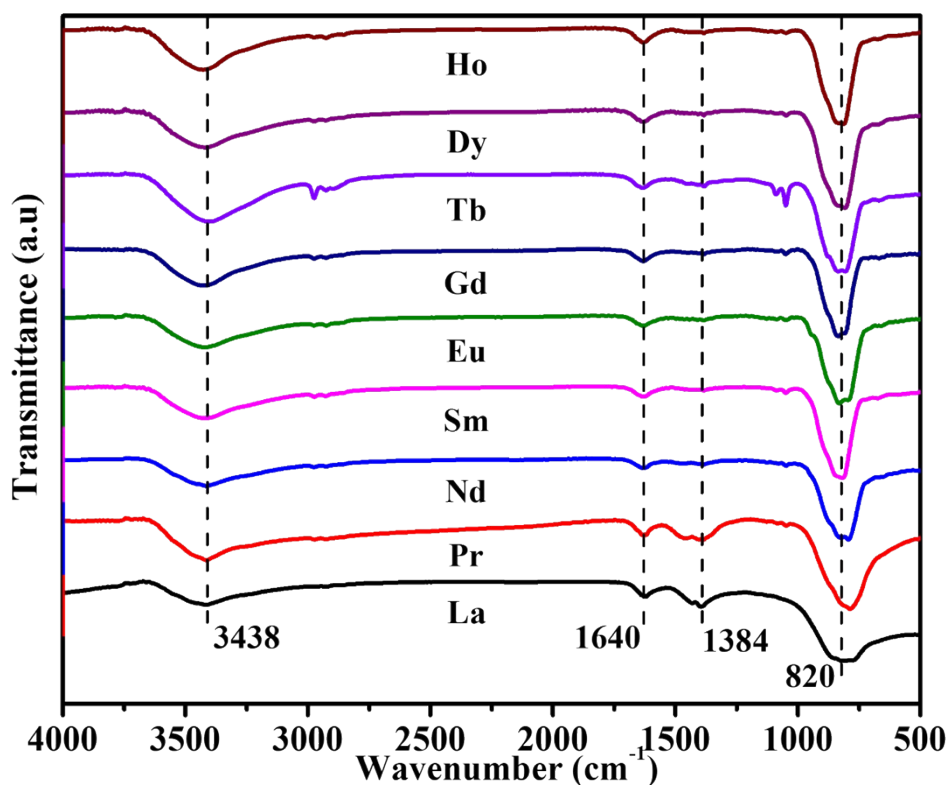

**Fig. S7.** FT-IR spectrum of the  $\text{REVO}_4$  (RE = La, Pr, Nd, Sm, Eu, Gd, Tb, Dy and Ho) films.

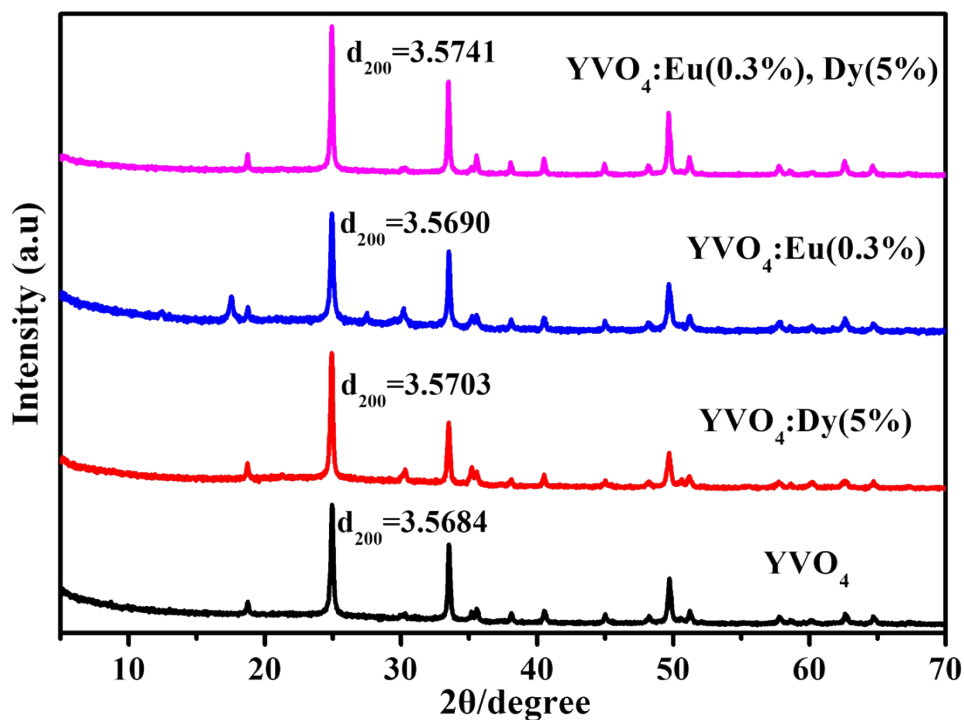

**Fig. S8.** XRD pattern of  $\text{YVO}_4$ ,  $(\text{Y}_{0.95}\text{Dy}_{0.05})\text{VO}_4$ ,  $(\text{Y}_{0.997}\text{Eu}_{0.003})\text{VO}_4$  and  $(\text{Y}_{0.947}\text{Eu}_{0.003}\text{Dy}_{0.05})\text{VO}_4$  films

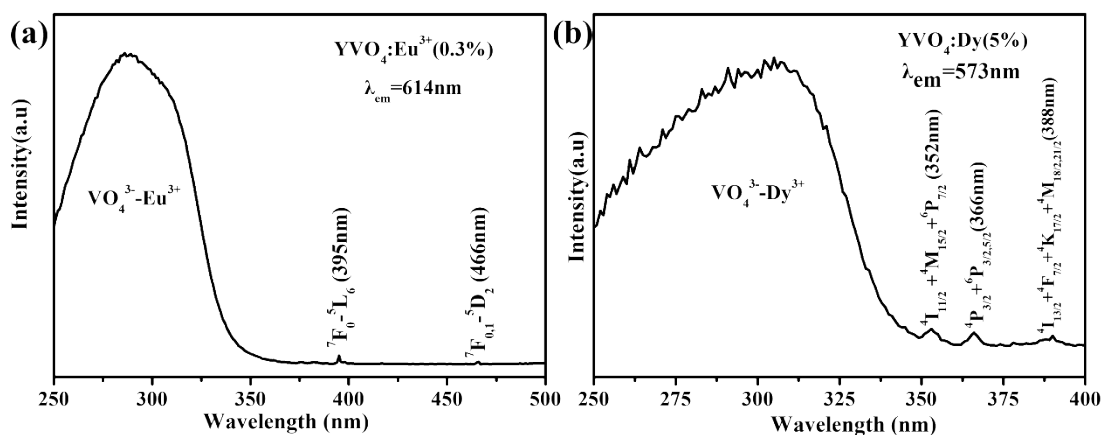

**Fig. S9.** Photoluminescence excitation spectra of the  $(\text{Y}_{0.997}\text{Eu}_{0.003})\text{VO}_4$  (a),  $(\text{Y}_{0.95}\text{Dy}_{0.05})\text{VO}_4$  (b) films recorded by monitoring the 614 nm  $\text{Eu}^{3+}$  emission (a) and 573 nm  $\text{Dy}^{3+}$  emission (b).

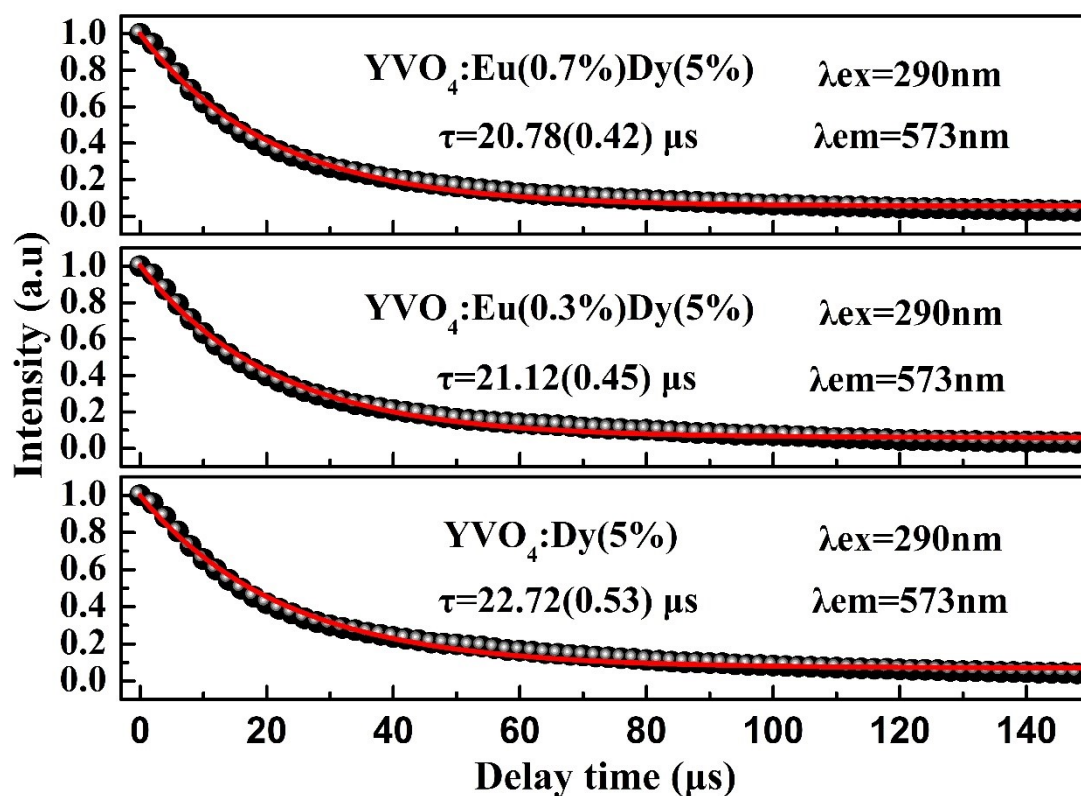

**Fig. S10.** Luminescence decay behaviors of the Dy<sup>3+</sup> doped samples with and without the Eu<sup>3+</sup> for the 573 nm emission under the 290 nm excitation.

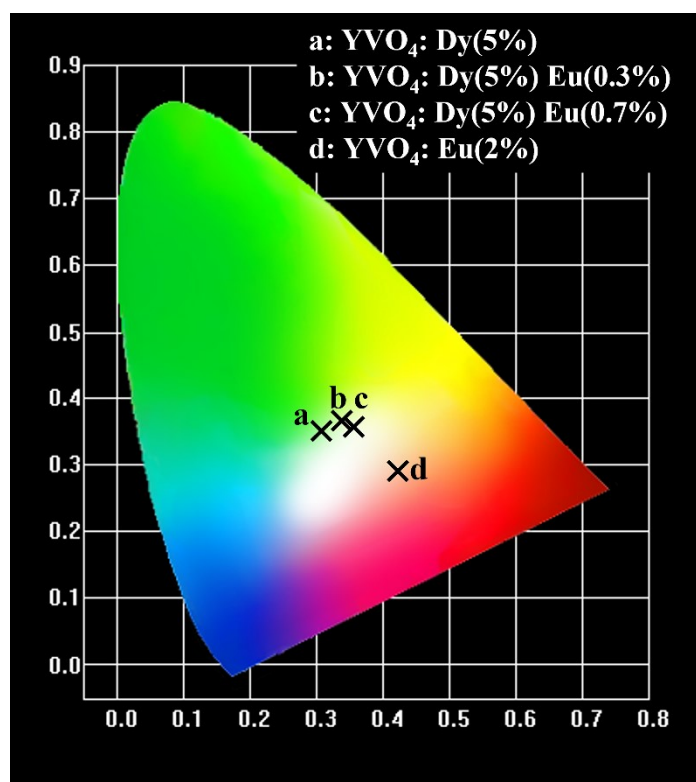

**Fig. S11.** CIE chromaticity diagram for the emission colors of the (Y<sub>0.95-x</sub>Dy<sub>0.05</sub>Eu<sub>x</sub>)VO<sub>4</sub> (x=0-0.01) films under 290 nm excitation.

Table S1. The results of structure refinement for YVO<sub>4</sub>:RE

| Sample                  | a=b(Å) | c(Å)  | V (Å <sup>3</sup> ) |
|-------------------------|--------|-------|---------------------|
| Standard                | 7.123  | 6.292 | 319.238             |
| YVO <sub>4</sub>        | 7.137  | 6.315 | 321.666             |
| YVO <sub>4</sub> :Dy    | 7.141  | 6.316 | 322.077             |
| YVO <sub>4</sub> :Eu    | 7.138  | 6.316 | 321.807             |
| YVO <sub>4</sub> :Eu,Dy | 7.148  | 6.318 | 322.811             |
